# Supplementary material
Source: PubMed Central journal article supplement (PMC3376722)
Supplement: NIHMS381027-supplement-01.pdf [file NIHMS381027-supplement-01.pdf]

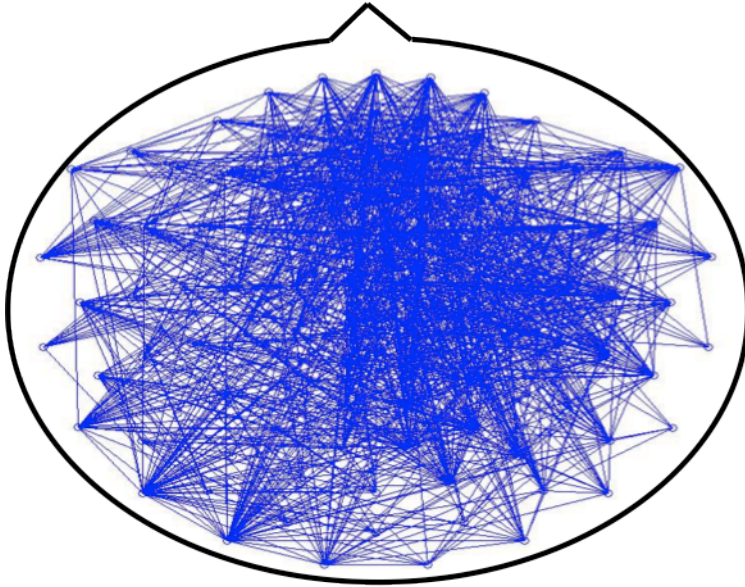

**Supplementary Figure S1:** Topography of significant group differences of coherence in the alpha band in the sensor space. The lines connect sensor site pairs that showed significantly lower coherence in the ASD group relative to the NT group. Their distribution has a right parieto-frontal preponderance consistent with the dominant role of the right hemisphere for visuospatial attention. It is also consistent with our finding of reduced coherence between FEFiR and the right dACC in the source-space data.
